# Supplementary material for: A frequency peak at 3.1 kHz obtained from the spectral analysis of the cochlear implant electrocochleography noise
Source: PLoS One. 2024 Mar 7;19(3):e0299911. doi: 10.1371/journal.pone.0299911 (PMC10919660; doi:10.1371/journal.pone.0299911)
Supplement: S1 File — (XLSX) [file pone.0299911.s001.xlsx]

## Sheet: Hoja1
Subject ID	Age	Hearing deprivation (years)	peak at 3.1 kHz	Oscillatory noise	PTA 0.5-4 kHz Hearing Thresholds	Apical electrode impedance
S1	78	8	0	1	116	4.1
S2	56	41	1	0	120	12.1
S3	72	64	0	0	125	3.7
S4	64	3	0	1	125	15
S5	59	19	1	0	125	7.8
S6	65	49	0	1	120	5.6
S7	48	35	1	0	125	4.3
S8	35	34	0	1	125	4
S9	46	43	0	0	116	5.7
S10	76	36	1	0	110	4.2
S11	65	10	1	0	125	3.5
S12	36	30	0	1	93	11.4
S13	51	15	1	0	124	3.3
S14	60	16	1	0	125	4.6
S15	57	52	0	1	125	11.4
S16	66	46	1	0	124	7.1
S17	67	22	1	0	125	5.9
S18	54	24	1	0	125	4.1
S19	37	10	1	0	125	3
S20	66	42	0	1	120	4.5
